# Supplementary material for: Removal of a melamine contaminant with Ag-doped ZnO nanocomposite materials
Source: Royal Society of Chemistry journal article supplement (doi:10.1039/c9nj04638k), 2019-01-01
Supplement: c9nj04638k1.pdf [file c9nj04638k1.pdf]

## Electronic Supplemental Section

### (Φ) Control Experiments:

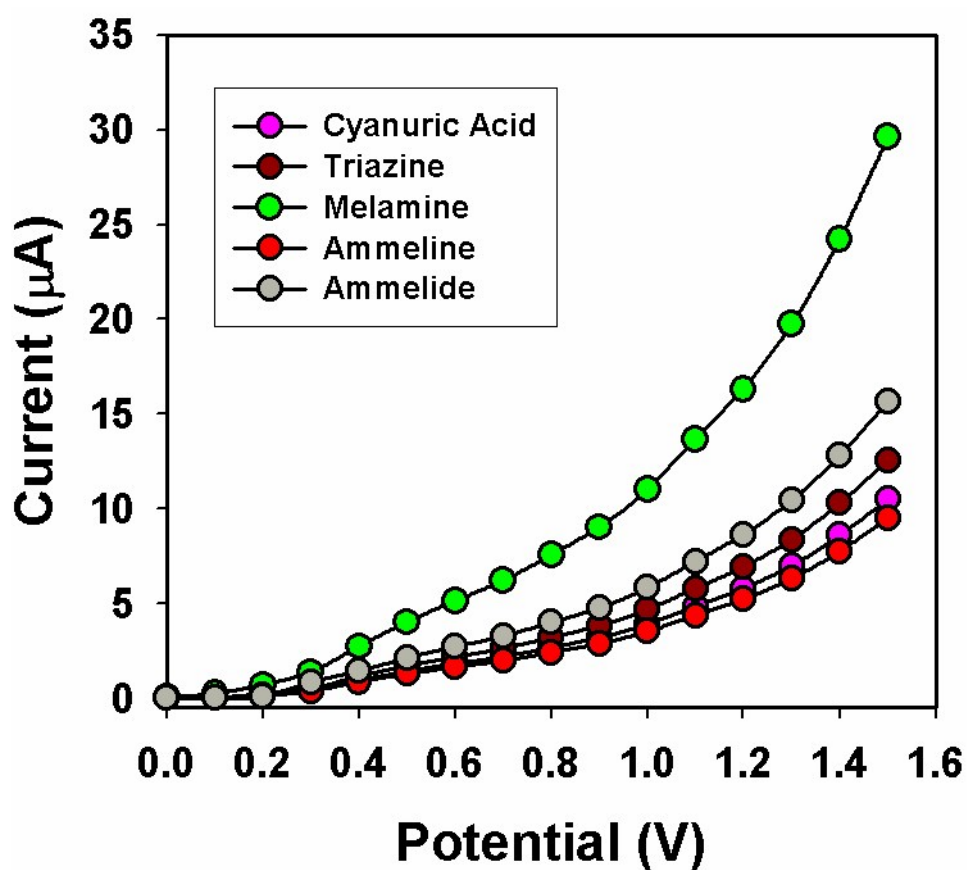

**Fig. S1:** Electrochemical response with similar compound by using Ag/ZnO/Nafion/GCE sensor materials in identical conditions.

**(Ψ) Stability of the sensor:**

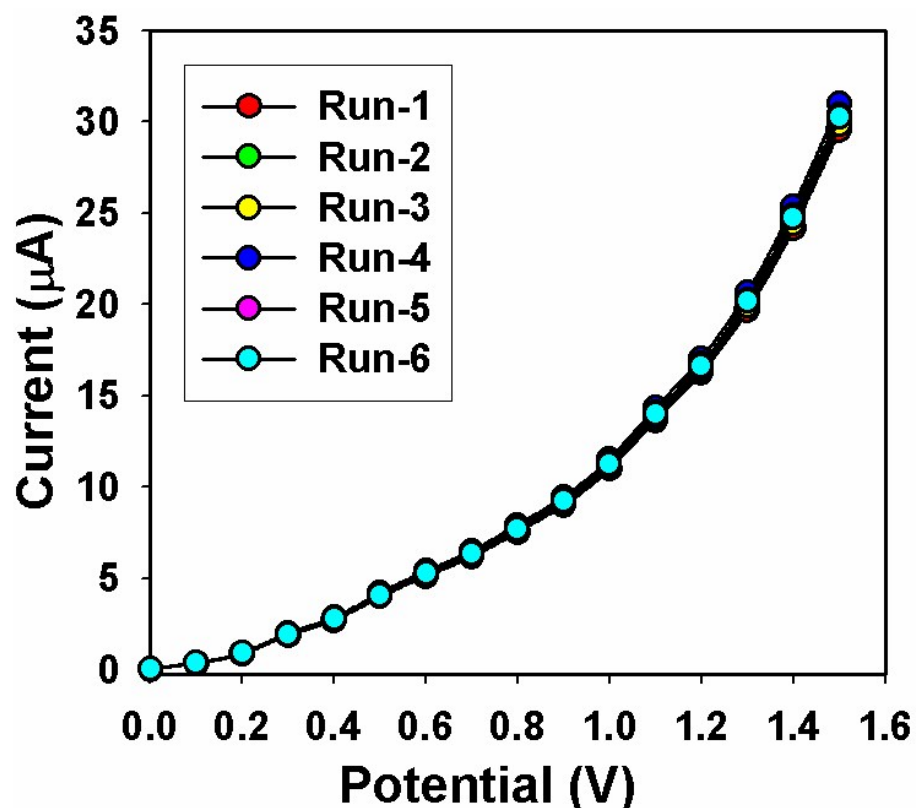

**Fig. S2:** Stability of the Ag/ZnO/Nafion/GCE fabricated sensor was studied for detection of melamine with different time interval (30 mins) from Run-1 to Run-6 in identical conditions.
